# Supplementary material
Source: PubMed Central journal article supplement (PMC7016924)
Supplement: ao9b03507_si_001.pdf [file ao9b03507_si_001.pdf]

Supporting information of:

Synthesis of Cobalt-Doped TiO<sub>2</sub> Based on Metal-Organic Frameworks as an Effective Electron Transport Material in Perovskite Solar Cells

Thi My Huyen Nguyen, Chung Wung Bark\*

Department of Electrical Engineering, Gachon University, 1342 Seongnam-daero, Sujeong-gu, Seongnam-si, Gyeonggi-do 13120, Korea

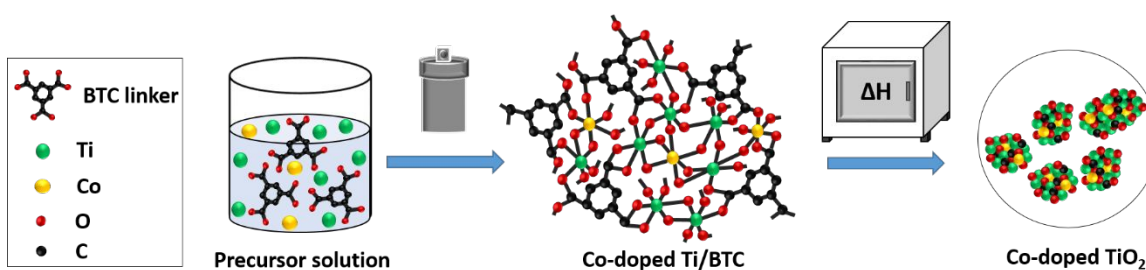

Figure S1. Schematic diagram of Co-doped TiO<sub>2</sub> particles preparation.

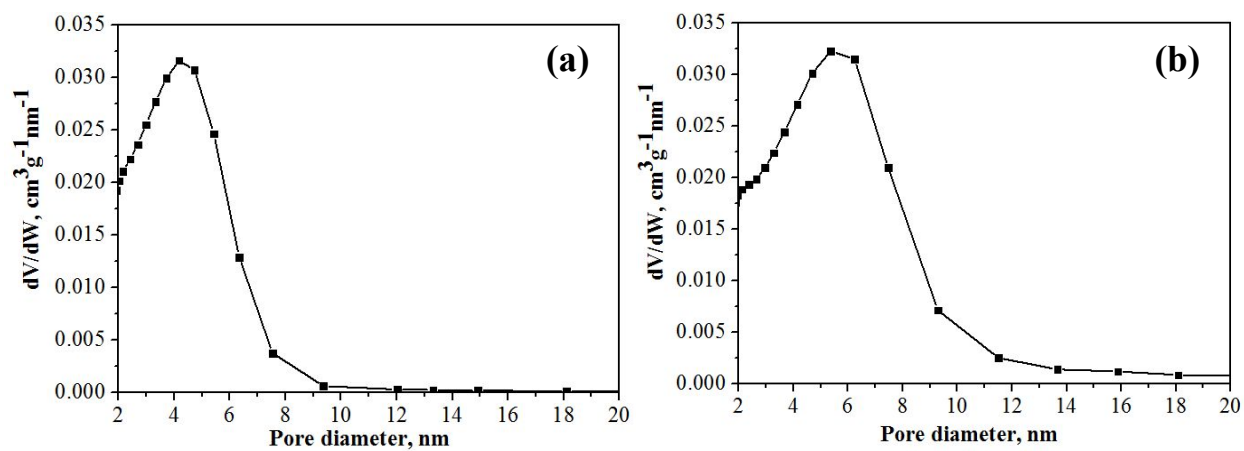

Figure S2. (a) Barrett-Joyner-Halenda (BJH) pore size distribution curve of TiO<sub>2</sub>. (b) 1 wt% Co-doped TiO<sub>2</sub>.

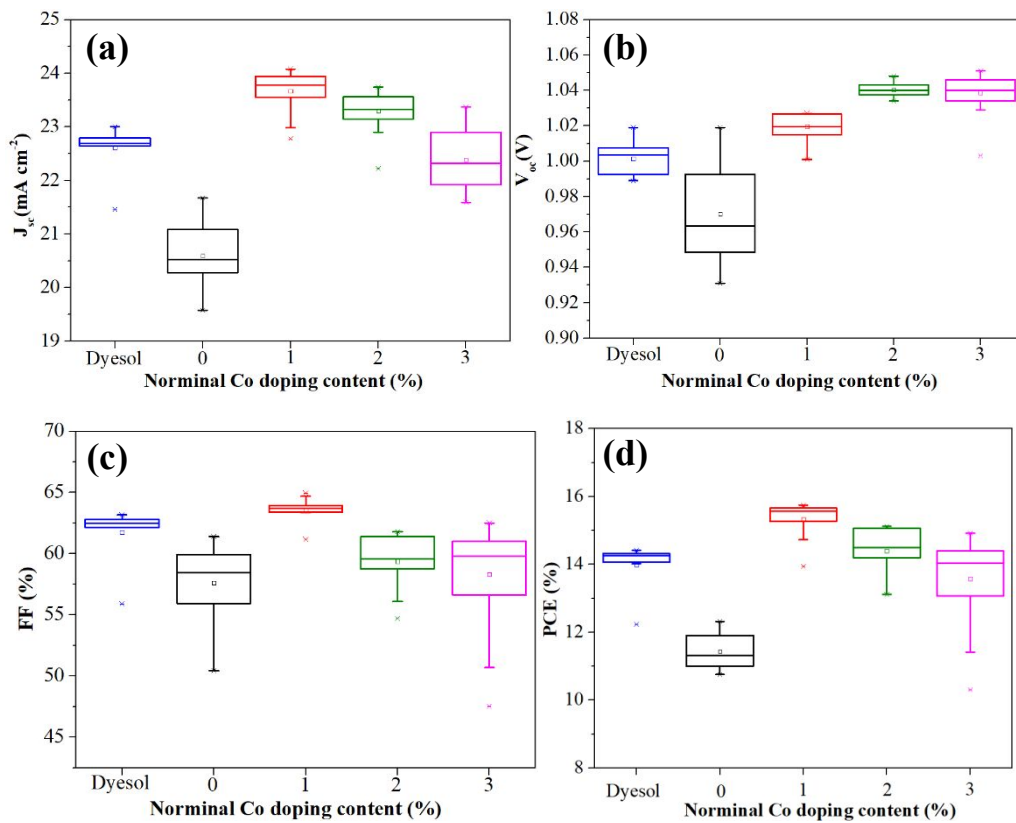

**Figure S3.** Statistical distribution of the parameters: (a)  $J_{sc}$ , (b)  $V_{oc}$ , (c) FF, (d) PCE dependence on nominal Co doping contents. The data were obtained from 20 pieces of devices with reverse scan for each condition.
